# Supplementary material
Source: PubMed Central journal article supplement (PMC6309425)
Supplement: NIHMS997288-supplement-supplemental.pdf [file NIHMS997288-supplement-supplemental.pdf]

1 **Supplementary Figures**

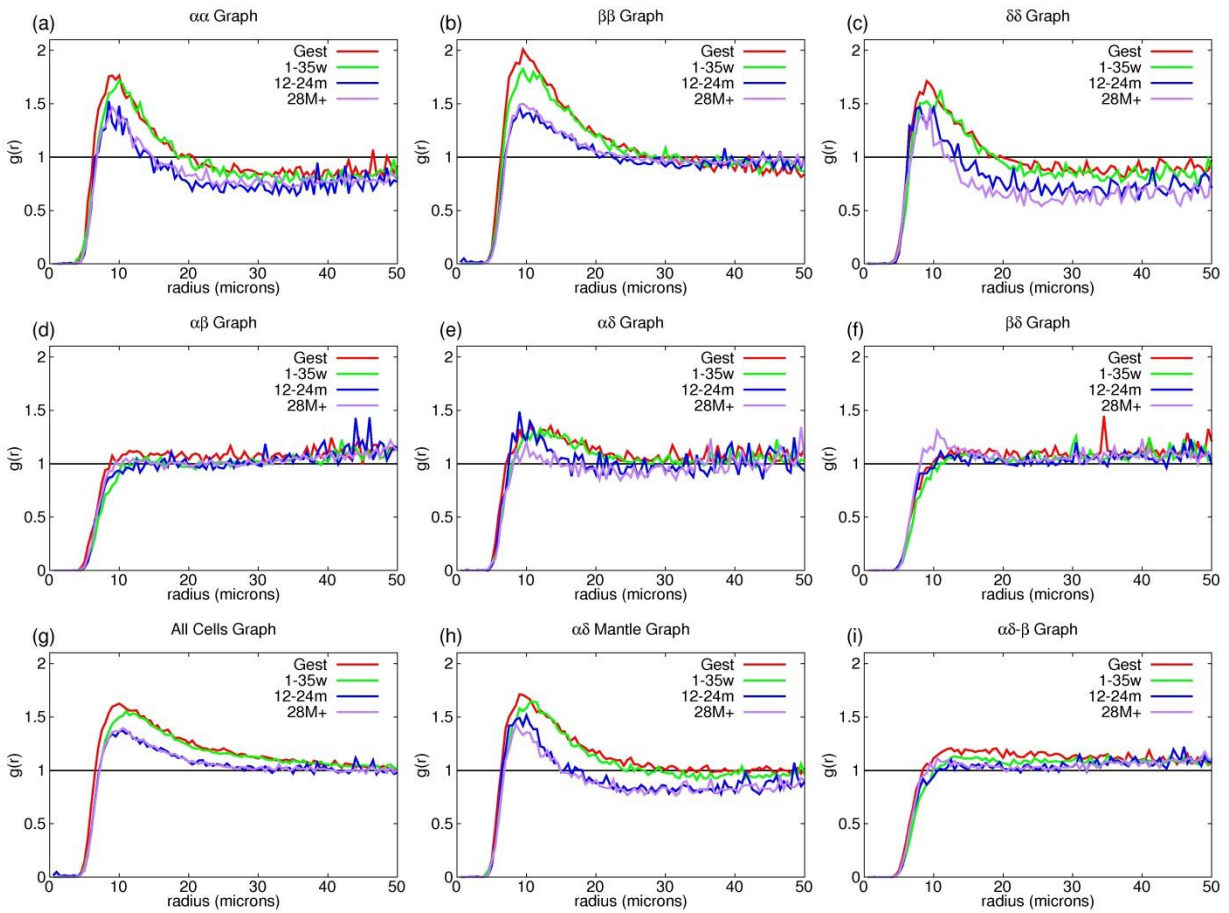

2

3 **Figure S1.** A range of radii, for which more intercell distance pairs than expected if the vertices were  
4 randomly distributed, are seen for  $\alpha\alpha$  (a),  $\beta\beta$  (b),  $\delta\delta$  (c), and  $\alpha\delta$  (e) graphs along with graphs representing  
5 all interactions (g) and the  $\alpha\delta$  graph (h).

6

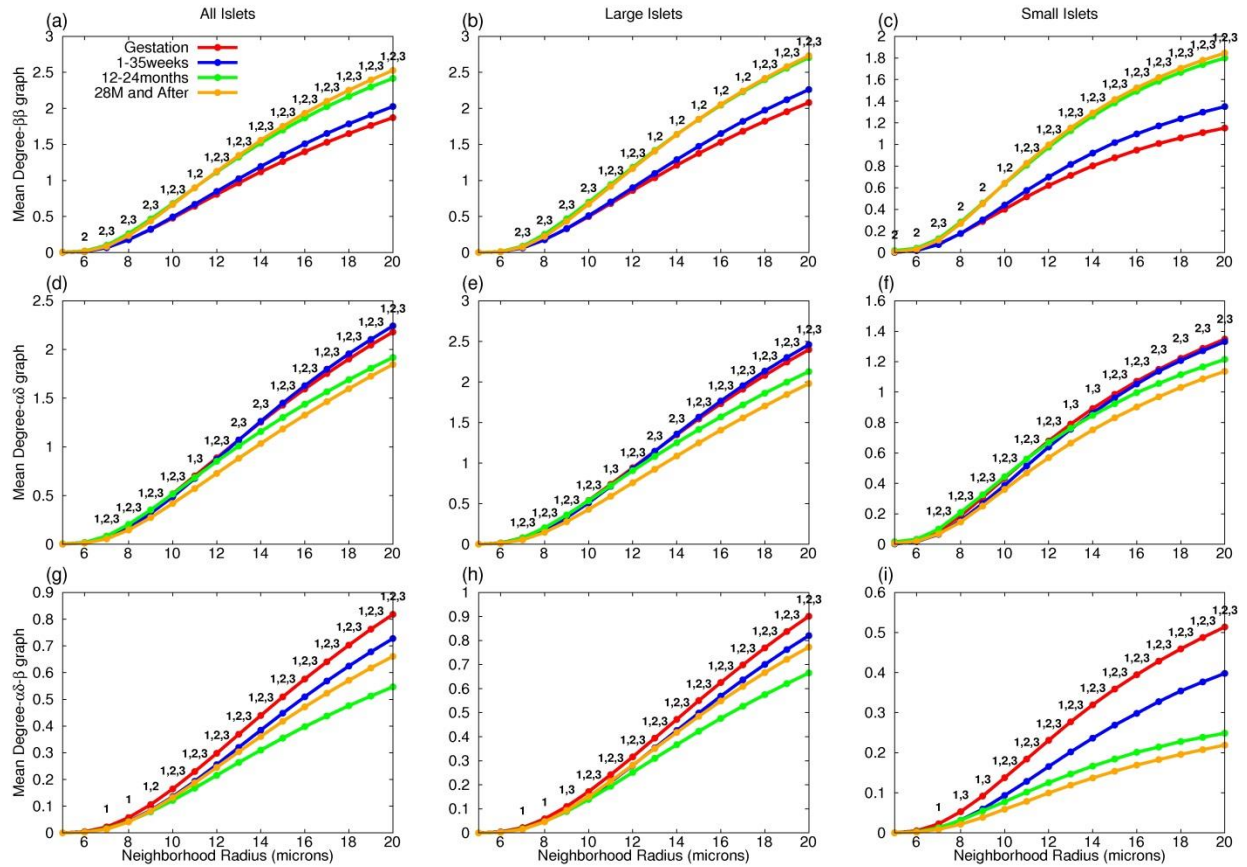

1

2

3

4

5

6

7

8

9

**Figure S2.** Statistical significance of mean degree does not vary greatly for radii around 10. (a)-(i).The mean degree of the  $\beta\beta$  graph (row 1),  $\alpha\delta$  graph (row 2), and  $\alpha\delta$ - $\beta$  graph (row 3) for all (column 1), large (column 2) and small (column 3) islets for different neighborhood radii. <sup>1,2,3</sup> indicate statically significant difference using Mann Whitney test with a Bonferroni correction (N = 48) between <sup>1</sup>gestation and 1-35 weeks, <sup>2</sup>1-35 weeks and 12-24 months , and <sup>3</sup>12-24 months to 28 months+. The neighborhood radius values used are to show how measure differences between datasets evolve with increased radius and are not meant to reflect biological function at any particular radius.

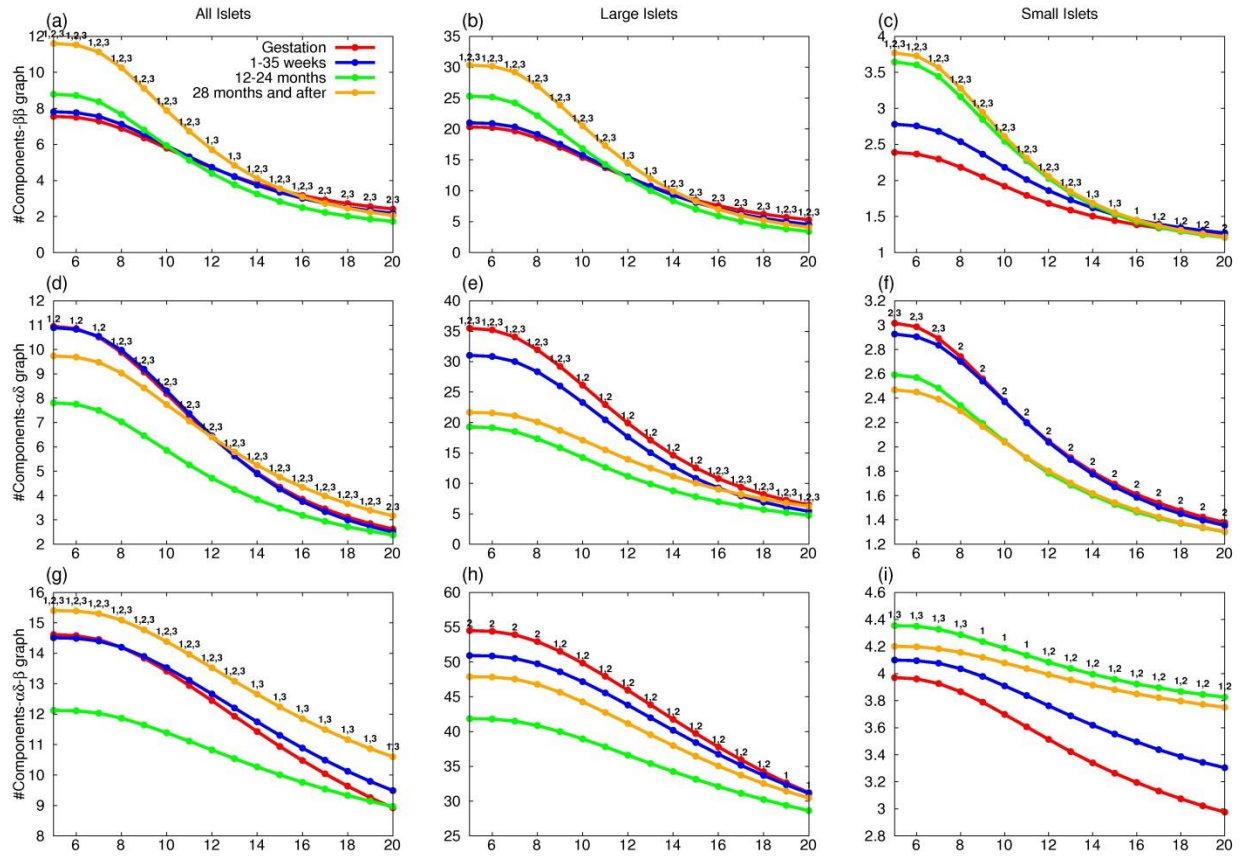

1  
 2 **Figure S3.** Statistical significance of number of components per islet does not vary greatly for radii  
 3 around 10. (a)-(i).The number of components per islet for the  $\beta\beta$  graph (row 1),  $\alpha\delta$  graph (row 2), and  $\alpha\delta$ -  
 4  $\beta$  graph (row 3) for all (column 1), large (column 2) and small (column 3) islets for different  
 5 neighborhood radii. <sup>1,2,3</sup> indicate statically significant difference using Mann Whitney test with a  
 6 Bonferroni correction (N = 48) between <sup>1</sup>gestation and 1-35 weeks, <sup>2</sup>1-35 weeks and 12-24 months , and  
 7 <sup>3</sup>12-24 months to 28 months+.

8  
 9

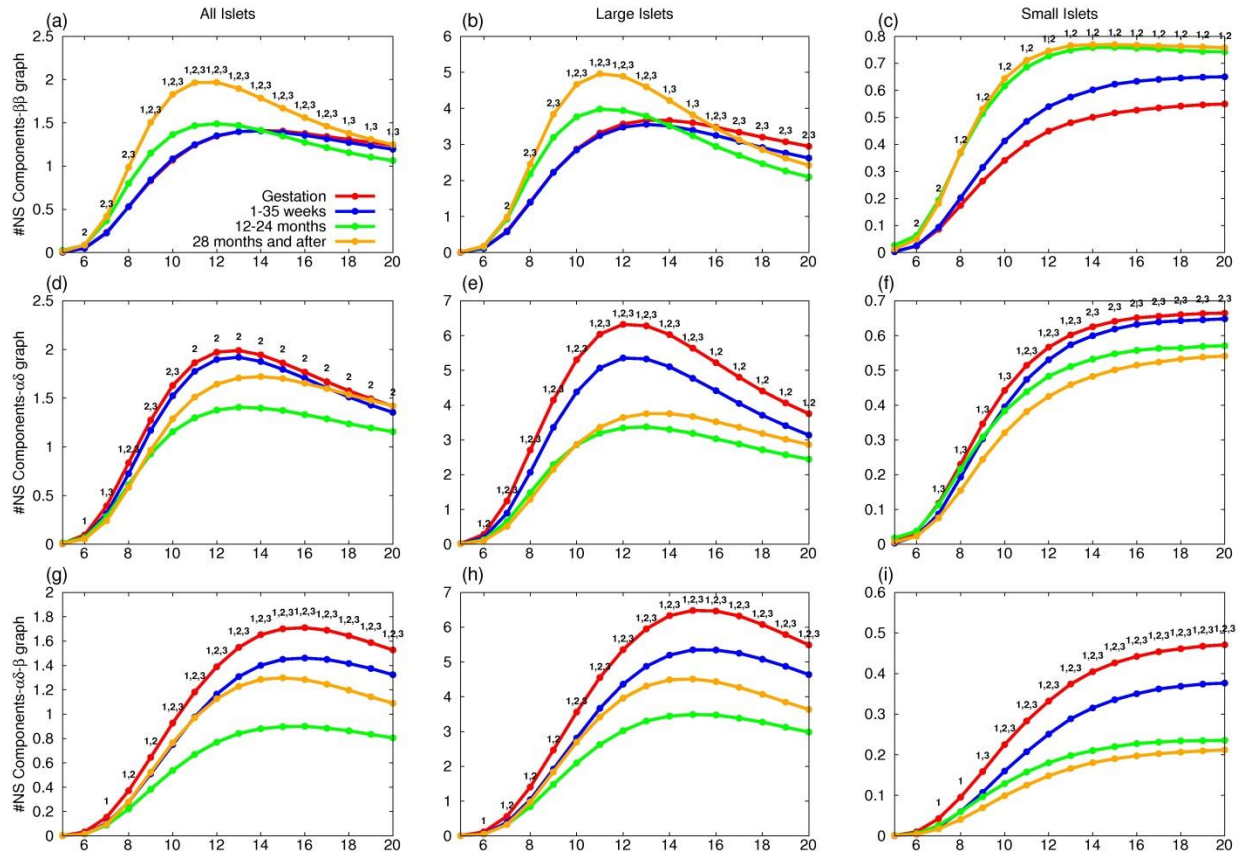

1  
 2 **Figure S4.** Statistical significance of number of nonsingular components per islet does not vary greatly  
 3 for radii around 10. (a)-(i).The number of nonsingular components per islet for the  $\beta\beta$  graph (row 1),  $\alpha\delta$   
 4 graph (row 2), and  $\alpha\delta-\beta$  graph (row 3) for all (column 1), large (column 2) and small (column 3) islets for  
 5 different neighborhood radii. <sup>1,2,3</sup> indicate statically significant difference using Mann Whitney test with a  
 6 Bonferoni correction (N = 48) between <sup>1</sup>gestation and 1-35 weeks, <sup>2</sup>1-35 weeks and 12-24 months , and  
 7 <sup>3</sup>12-24 months to 28 months+.

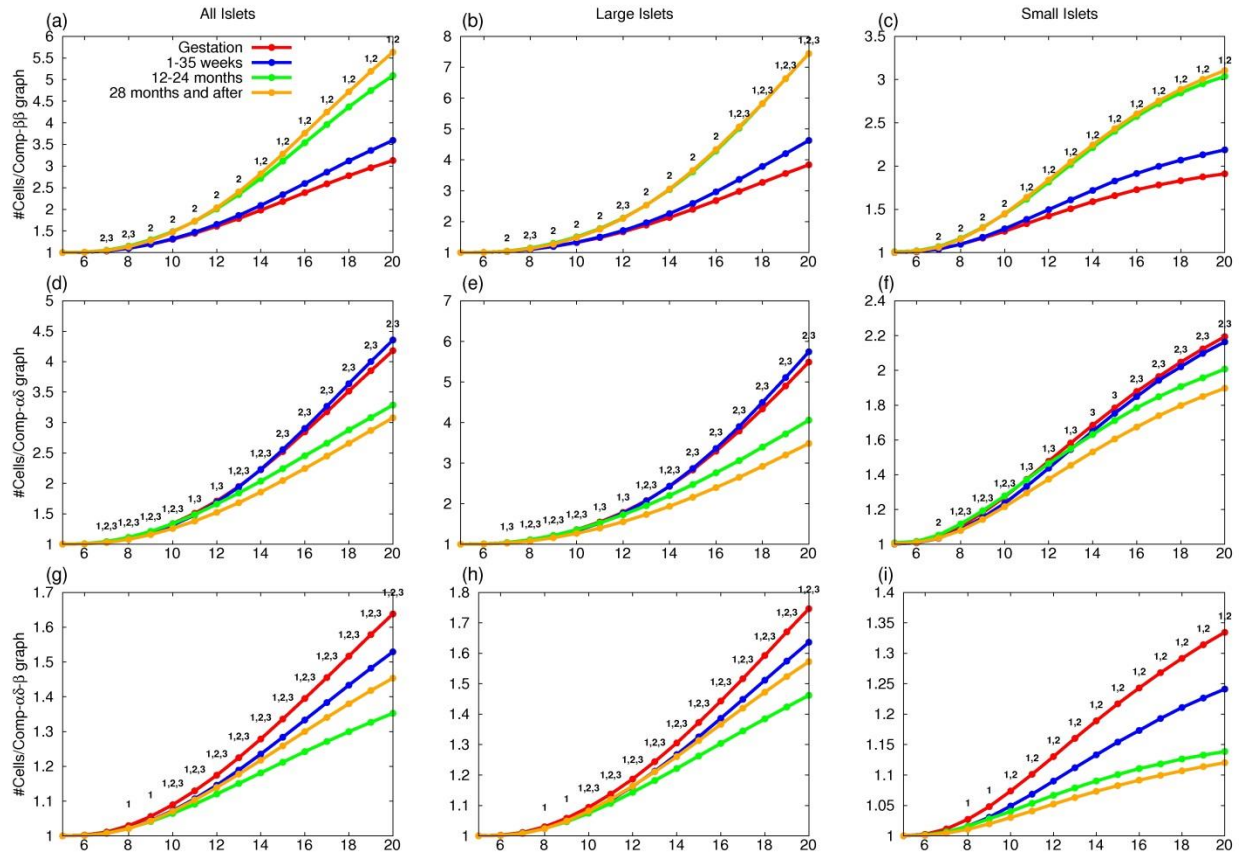

1  
 2 **Figure S5.** Statistical significance of number of cells per component does not vary greatly for radii  
 3 around 10. (a)-(i).The number of cells per components for the  $\beta\beta$  graph (row 1),  $\alpha\delta$  graph (row 2), and  $\alpha\delta$ -  
 4  $\beta$  graph (row 3) for all (column 1), large (column 2) and small (column 3) islets for different  
 5 neighborhood radii. <sup>1,2,3</sup> indicate statically significant difference using Mann Whitney test with a  
 6 Bonferoni correction ( $N = 48$ ) between <sup>1</sup>gestation and 1-35 weeks, <sup>2</sup>1-35 weeks and 12-24 months , and  
 7 <sup>3</sup>12-24 months to 28 months+.



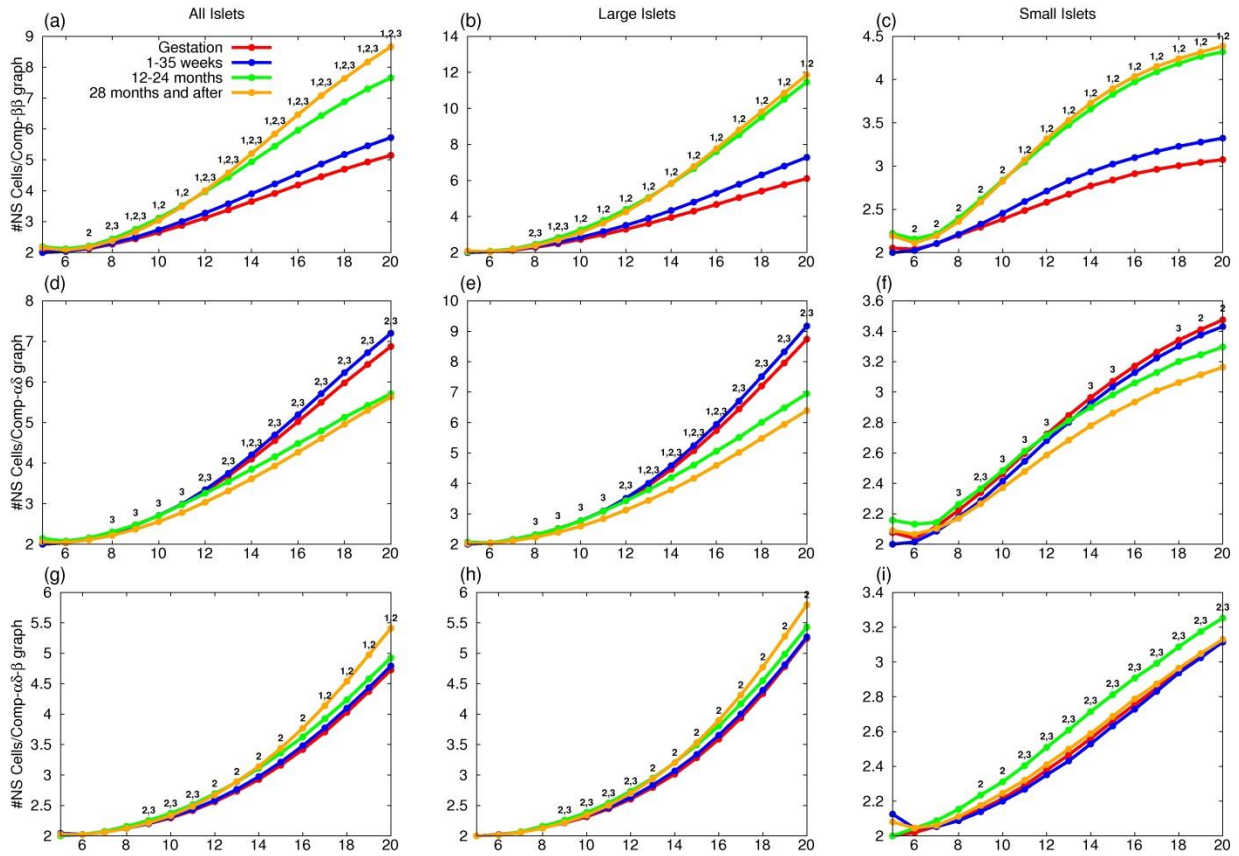

1  
 2 **Figure S6.** Statistical significance of number of cells per nonsingular component does not vary greatly for  
 3 radii around 10. (a)-(i).The number of cells per nonsingular components for the  $\beta\beta$  graph (row 1),  $\alpha\delta$   
 4 graph (row 2), and  $\alpha\delta-\beta$  graph (row 3) for all (column 1), large (column 2) and small (column 3) islets for  
 5 different neighborhood radii. <sup>1,2,3</sup> indicate statically significant difference using Mann Whitney test with a  
 6 Bonferroni correction (N = 48) between <sup>1</sup>gestation and 1-35 weeks, <sup>2</sup>1-35 weeks and 12-24 months , and  
 7 <sup>3</sup>12-24 months to 28 months+.

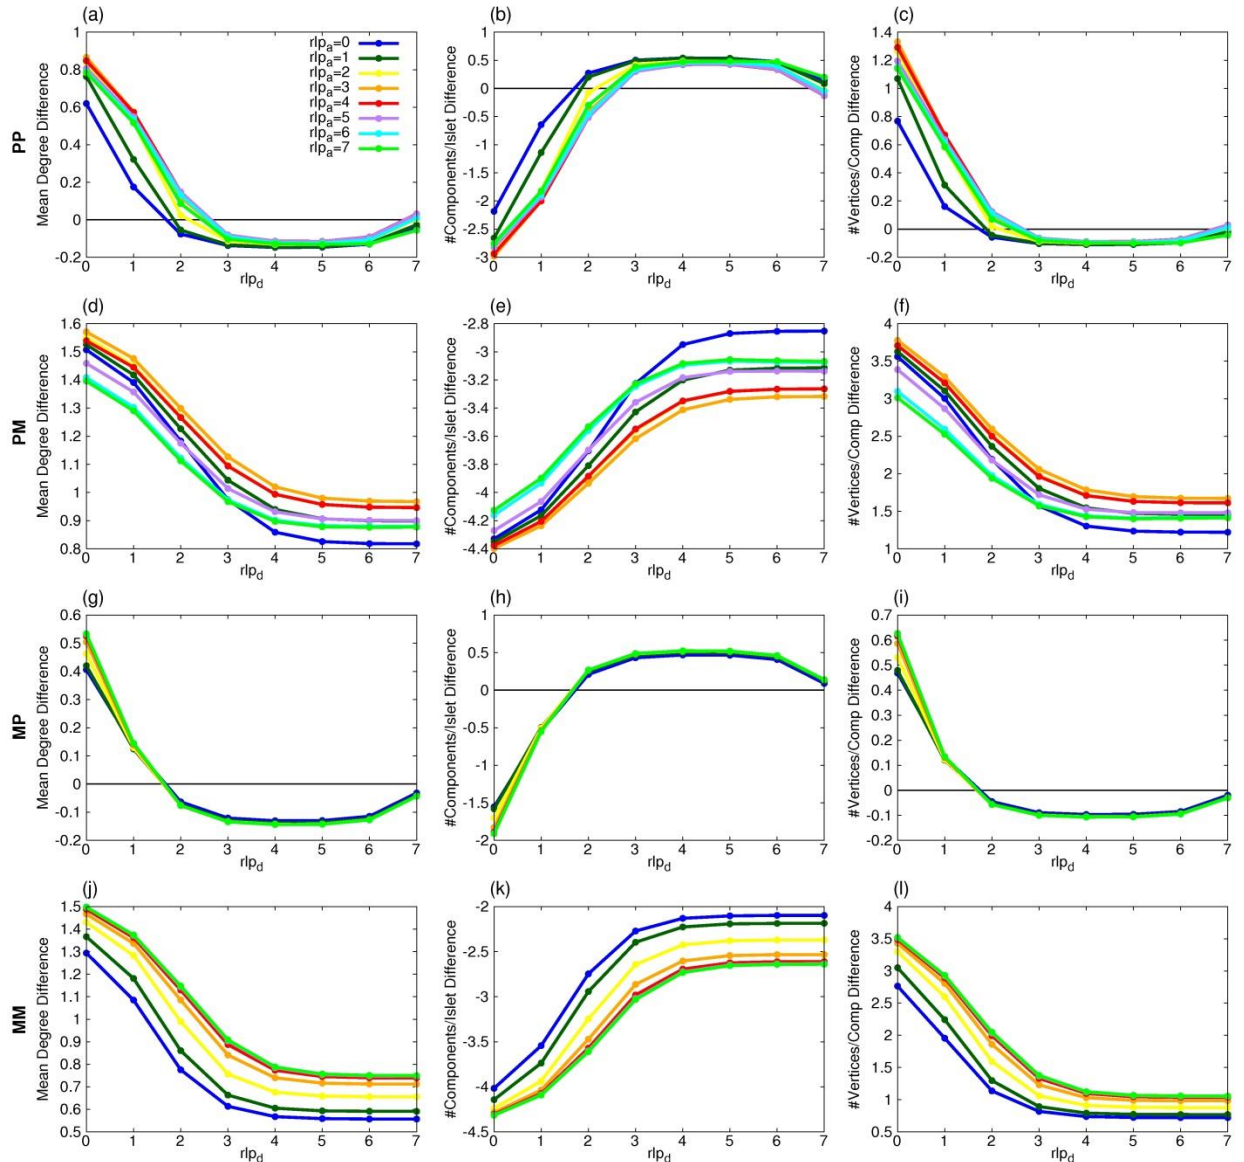

1

2

**Figure S7.** Transition 1 (gestation to 1-35 weeks)  $\beta\beta$  graph simulation measure differences. The difference in mean degree (column 1), number of components per islet graph (column 2) and number of vertices per component (column 3) between the resulting  $\beta\beta$  graph simulation and that of the next developmental stage, 1-35 weeks, for each process, (PP (row 1), PM (row 2), MP (row 3) and MM (row 4)) Each point represents a given  $(rlp_a, rlp_d)$  pair. Measure equilibria are found for each developmental transition for the PP and MP processes.

8

9

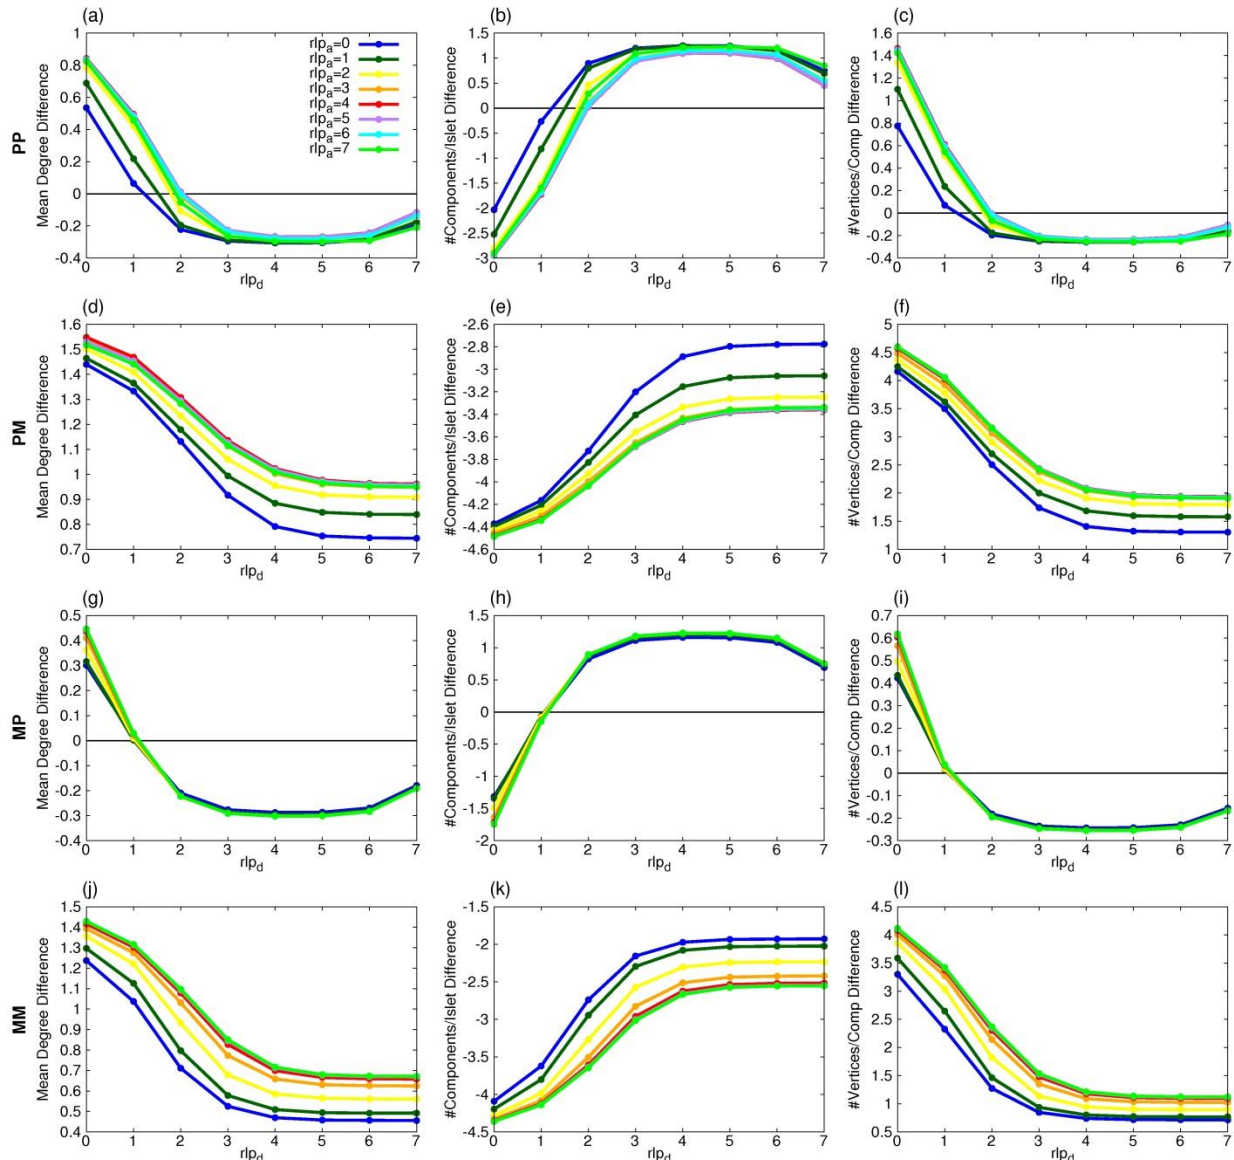

1  
 2 **Figure S8.** Transition 2 (1-35 weeks to 12-24 months)  $\beta\beta$  graph simulation measure differences. The  
 3 difference in mean degree (column 1), number of components per islet graph (column 2) and number of  
 4 vertices per component (column 3) between the resulting  $\beta\beta$  graph simulation and that of the next  
 5 developmental stage, 12-24 months, for each process, (PP (row 1), PM (row 2), MP (row 3) and MM  
 6 (row 4)) Each point represents a given ( $rlp_a, rlp_d$ ) pair. Measure equilibria are found for each  
 7 developmental transition for the PP and MP processes.

8  
 9



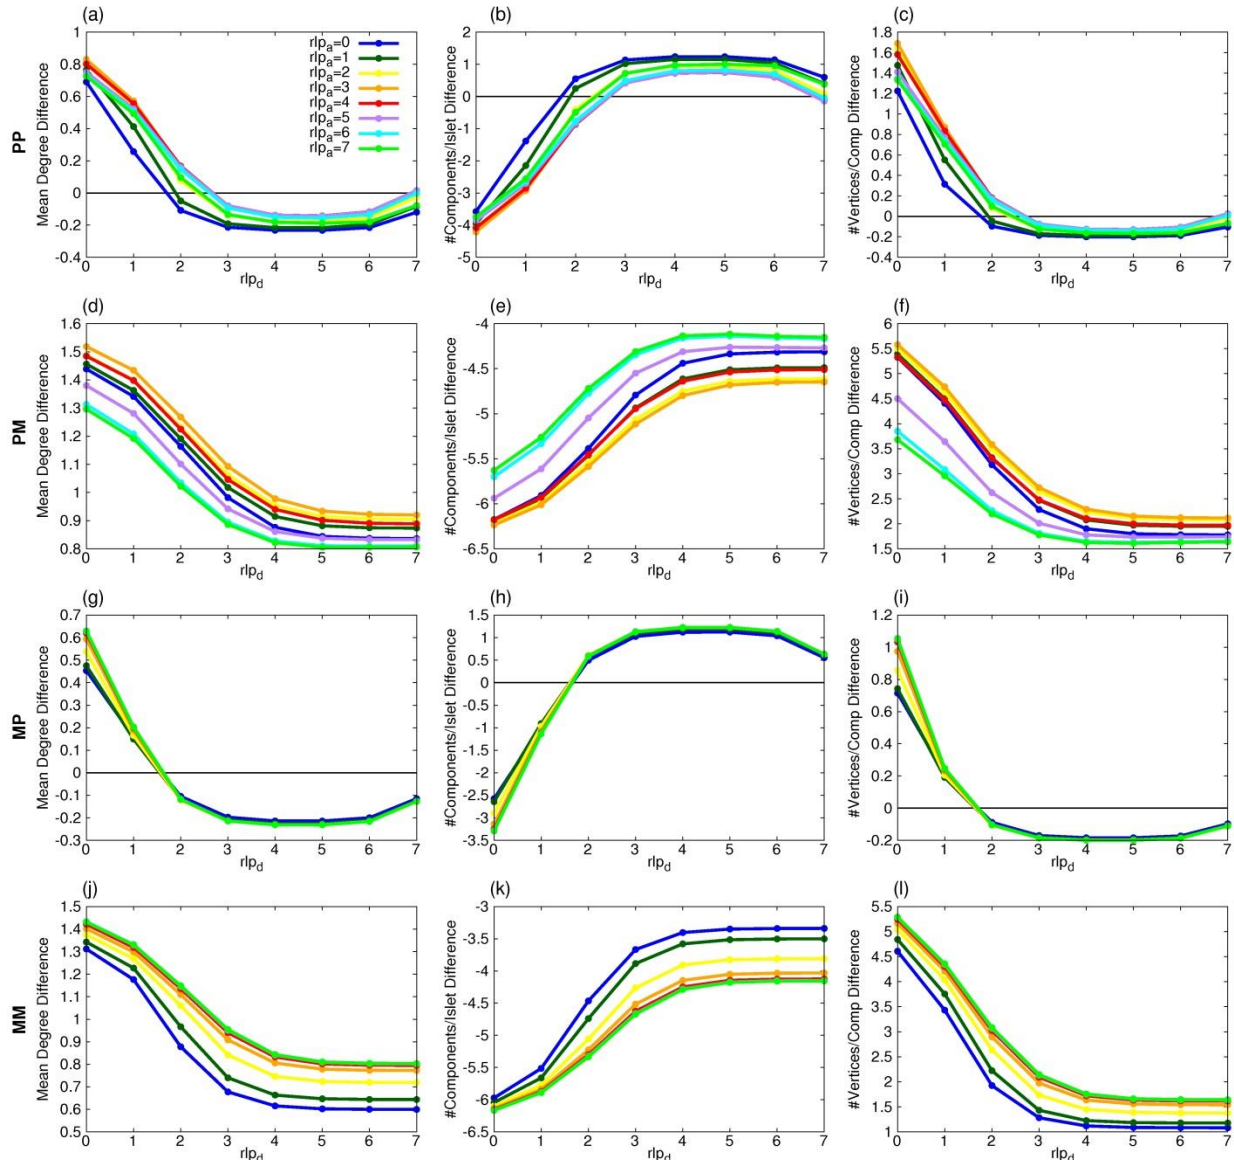

1

2 **Figure S9.** Transition 3 (12-24 months to 28 months+)  $\beta\beta$  graph simulation measure differences. The  
 3 difference in mean degree (column 1), number of components per islet graph (column 2) and number of  
 4 vertices per component (column 3) between the resulting  $\beta\beta$  graph simulation and that of the next  
 5 developmental stage, 28 months+, for each process, (PP (row 1), PM (row 2), MP (row 3) and MM (row  
 6 4)) Each point represents a given ( $rlp_a, rlp_d$ ) pair. Measure equilibria are found for each developmental  
 7 transition for the PP and MP processes.

8

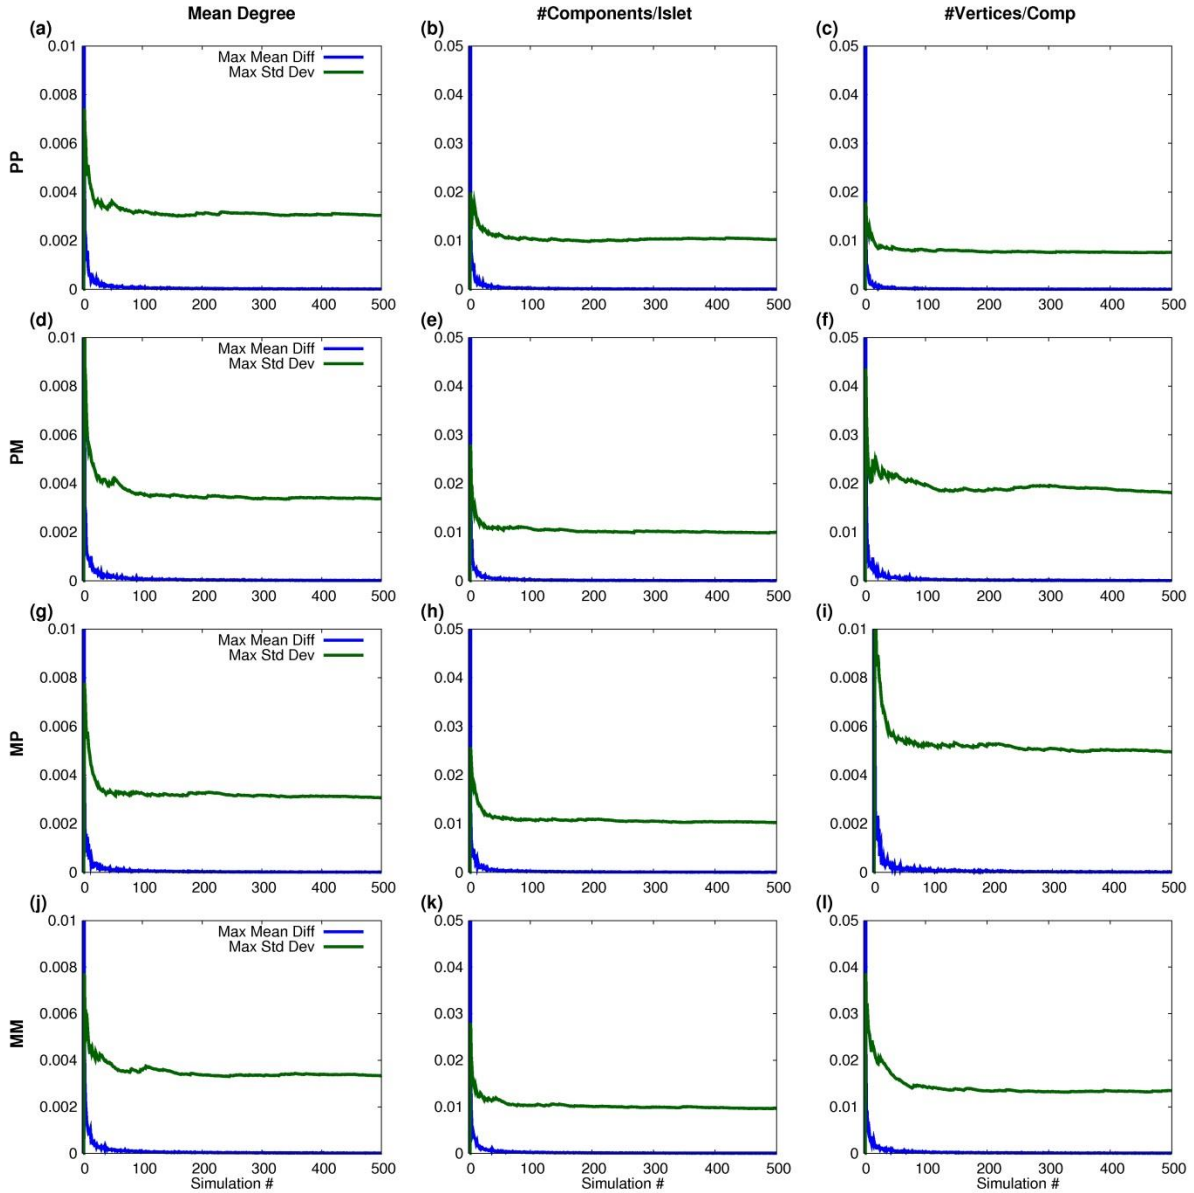

1

2 **Figure S10.** Transition 1 (gestation to 1-35 weeks) simulation convergence. The maximal change of  
 3 mean degree and standard deviation per  $(rlp_a, rlp_d)$  pair is plotted with respect to the addition of each  
 4 simulation. Each subgraph corresponds to the results given in figure S7.

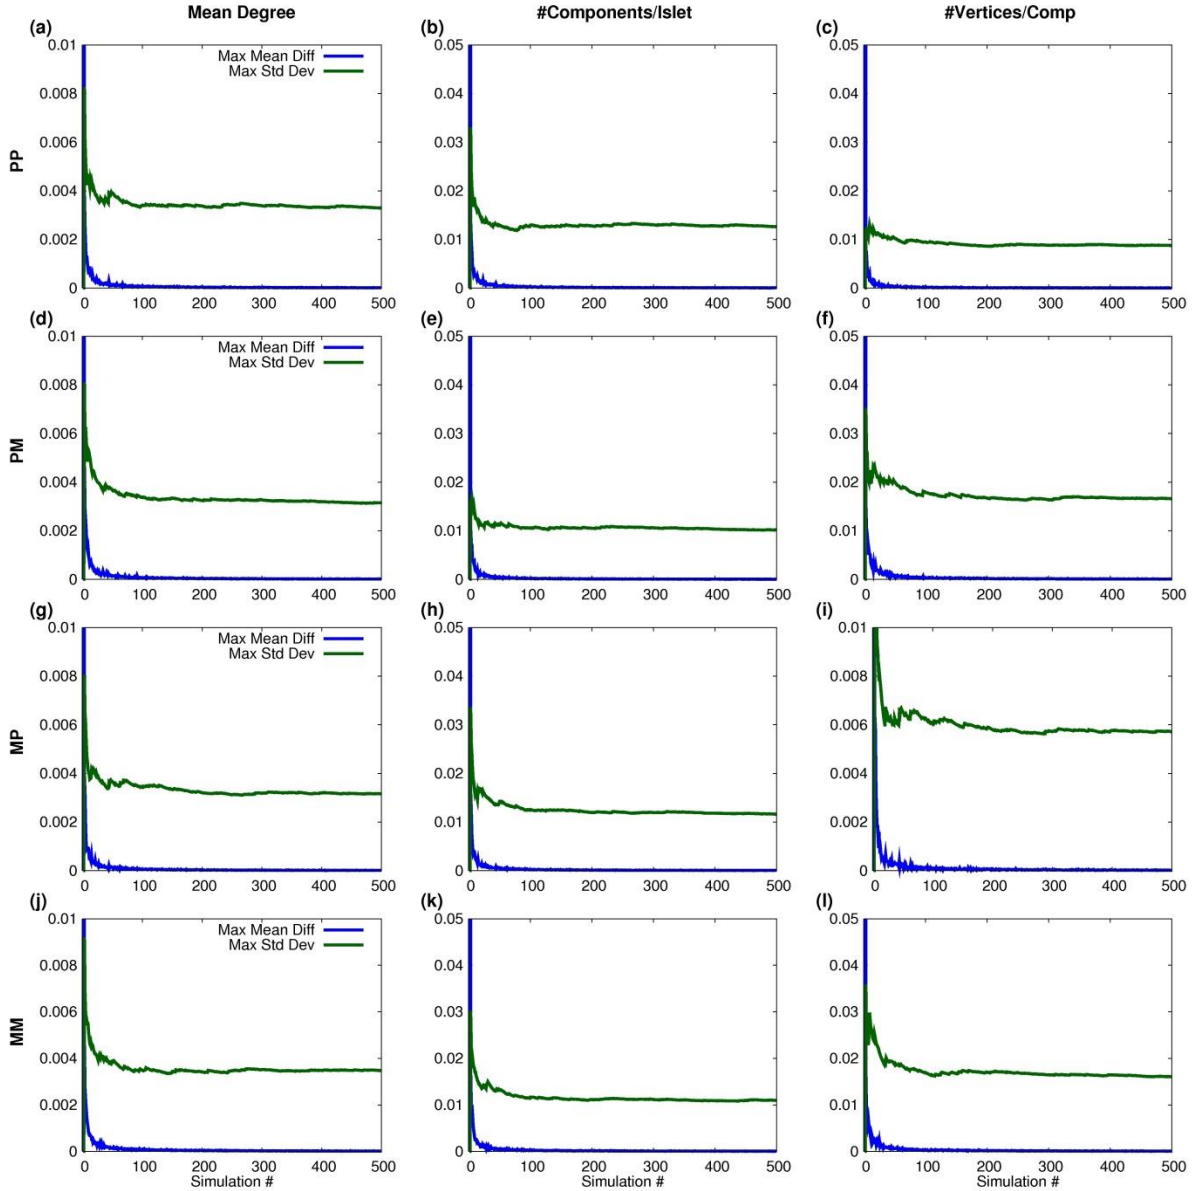

1

2

**Figure S11.** Transition 2 (1-35 weeks to 12-24 months) simulation convergence. The maximal change of mean degree and standard deviation per  $(rlp_a, rlp_d)$  pair is plotted with respect to the addition of each simulation. Each subgraph corresponds to the results given in figure S8.

5

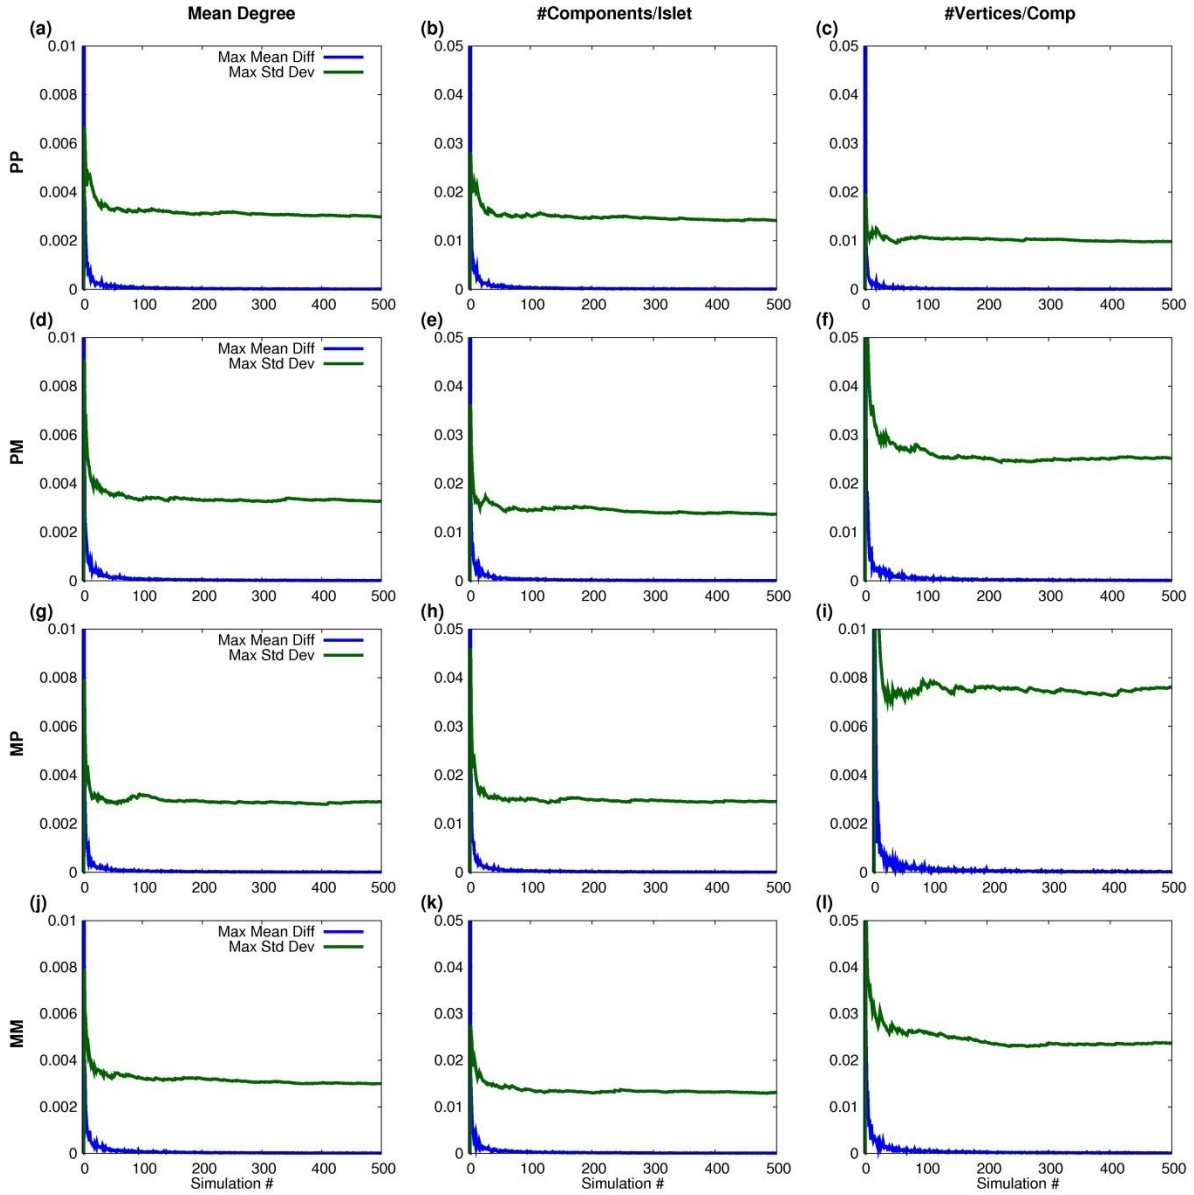

1

2 **Figure S12.** Transition 3 (12-24 months to 28 months+) simulation convergence. The maximal change of  
 3 mean degree and standard deviation per  $(rlp_a, rlp_d)$  pair is plotted with respect to the addition of each  
 4 simulation. Each subgraph corresponds to the results given in figure S9.

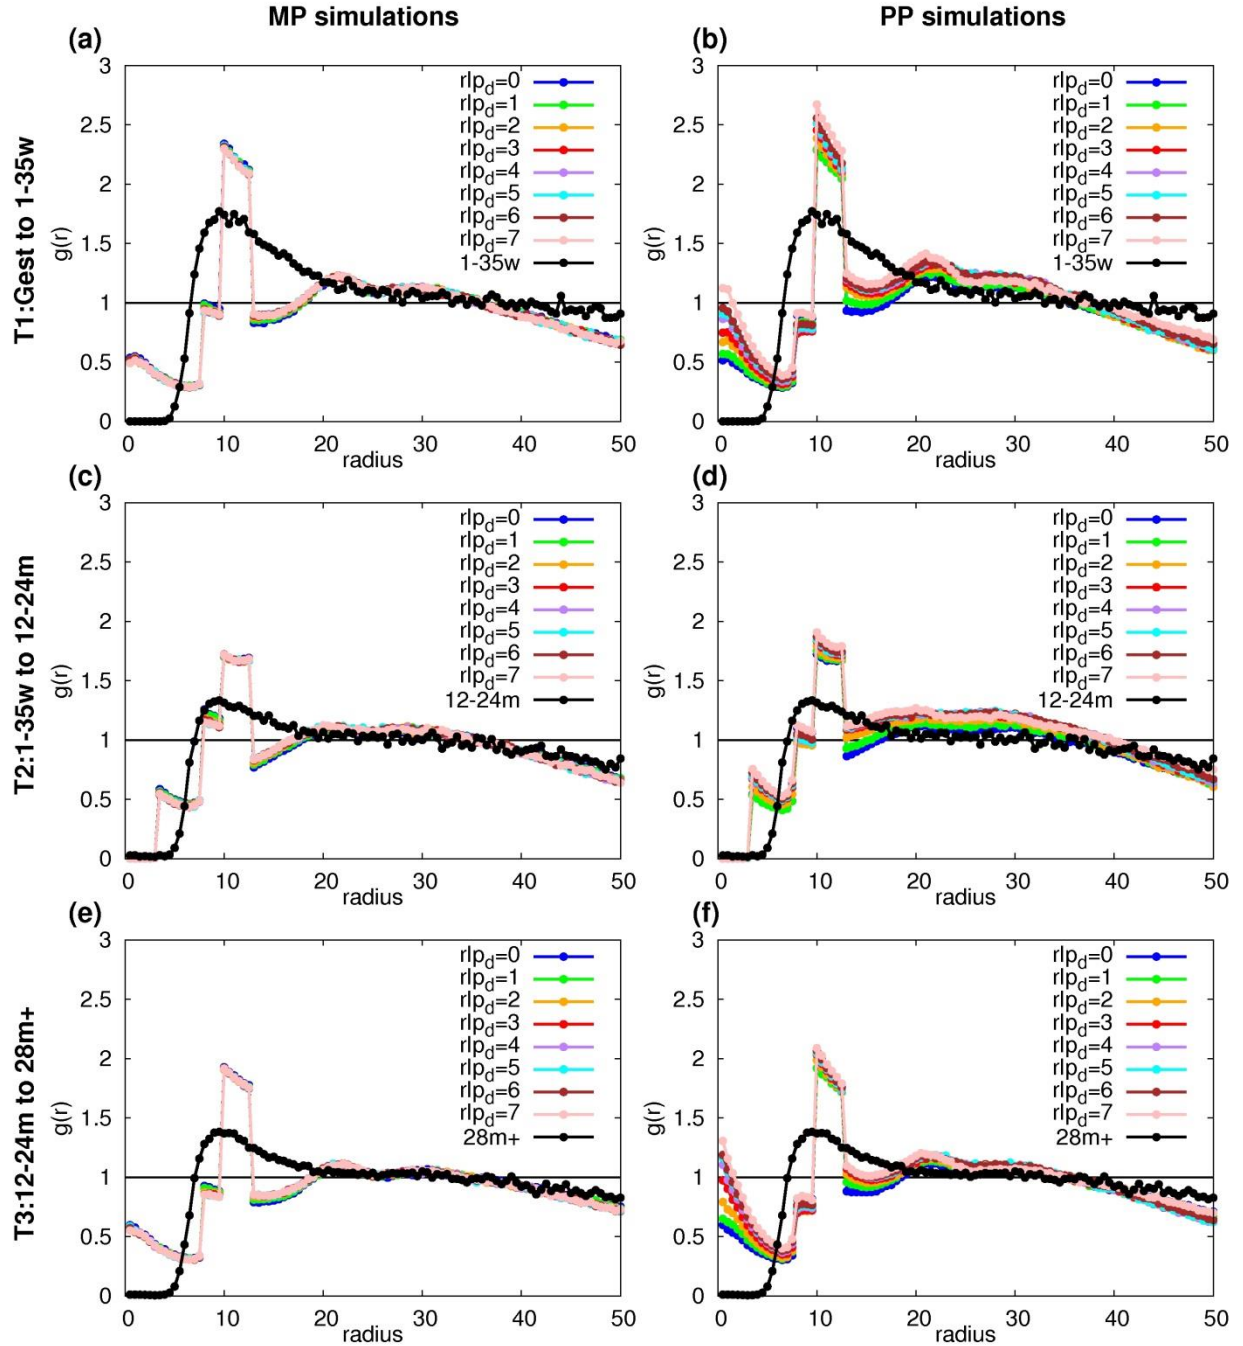

1

2

3

4

5

6

7

8

**Figure S13.** Pair correlation functions of the measure-equilibrium simulations for each transition. Ten simulations were run for each  $(rlp_a, rlp_d)$  producing measure equilibria (values are given in Table S10). The average pair correlation function was found for islets containing more than 5 cells and compared to the islets containing more than 5 cells in the next developmental stage. The integration of the absolute value of the difference between the pair correlation function of the given dataset and that of each measure equilibrium is given in Table S10.



1 Supplementary Tables

2 **Table S1.** The mean and standard deviation of the vertex degree of the  $\beta\beta$  graph (corresponding to figure  
 3 5(a)). The number of vertices having a given degree is also given per dataset and islet size.

| Islet Size | Dataset      | Mean  | Std Dev | Degree Count |         |        |        |       |    |
|------------|--------------|-------|---------|--------------|---------|--------|--------|-------|----|
|            |              |       |         | 0            | 1       | 2      | 3      | 4     | 5  |
| all        | Gestation    | 0.477 | 0.695   | 124,555      | 56,798  | 15,404 | 2,290  | 144   | 6  |
| all        | 1-35 weeks   | 0.493 | 0.714   | 109,443      | 49,705  | 14,742 | 2,410  | 156   | 7  |
| all        | 12-24 months | 0.679 | 0.831   | 97,984       | 60,383  | 24,511 | 5,526  | 559   | 19 |
| all        | 28 months+   | 0.665 | 0.813   | 262,968      | 163,766 | 63,699 | 13,138 | 1,192 | 34 |
| large      | Gestation    | 0.500 | 0.7151  | 94,888       | 44,045  | 13,132 | 2,066  | 137   | 5  |
| large      | 1-35 weeks   | 0.512 | 0.7361  | 80,514       | 36,202  | 12,032 | 2,078  | 137   | 6  |
| large      | 12-24 months | 0.699 | 0.853   | 66,433       | 40,009  | 17,675 | 4,274  | 440   | 17 |
| large      | 28 months+   | 0.672 | 0.823   | 202,736      | 123,835 | 50,511 | 10,793 | 973   | 26 |
| small      | Gestation    | 0.401 | 0.611   | 29,665       | 12,755  | 2,272  | 224    | 7     | 1  |
| small      | 1-35 weeks   | 0.440 | 0.644   | 28,929       | 13,503  | 2,711  | 330    | 20    | 1  |
| small      | 12-24 months | 0.637 | 0.780   | 31,551       | 20,373  | 6,838  | 1,251  | 119   | 2  |
| small      | 28 months+   | 0.641 | 0.777   | 60,231       | 39,935  | 13,185 | 2,345  | 219   | 8  |

4

5



1 **Table S3.** The mean and standard deviation of the number of cells per component of the  $\beta\beta$  graph  
2 (corresponding to figure 5(c)). The number of components having a given number of cells is also shown  
3 per dataset and islet size. Values for nonsingular islets are given in parentheses.

| Islet Size | Data   | Mean          | Std Dev       | # Cells-per-Component Count |       |       |      |      |      |      |     |     |      |
|------------|--------|---------------|---------------|-----------------------------|-------|-------|------|------|------|------|-----|-----|------|
|            |        |               |               | 1                           | 2     | 3     | 4    | 5    | 6    | 7    | 8   | 9   | 10+  |
| all        | Gest   | 1.304 (2.651) | 0.863 (1.348) | 124555                      | 18521 | 5619  | 2079 | 922  | 430  | 233  | 125 | 60  | 164  |
| all        | 1-35w  | 1.318 (2.737) | 0.909 (1.434) | 109443                      | 15504 | 4957  | 1979 | 940  | 464  | 261  | 135 | 72  | 179  |
| all        | 12-24m | 1.486 (3.113) | 1.390 (2.229) | 97984                       | 16560 | 6003  | 2757 | 1354 | 841  | 510  | 325 | 247 | 633  |
| all        | 28m+   | 1.474 (3.042) | 1.268 (1.929) | 262968                      | 45113 | 16459 | 7522 | 4086 | 2221 | 1323 | 891 | 577 | 1314 |
| large      | Gest   | 1.323 (2.729) | 0.923 (1.460) | 94888                       | 13766 | 4489  | 1749 | 822  | 379  | 217  | 115 | 58  | 162  |
| large      | 1-35w  | 1.333 (2.843) | 0.974 (1.573) | 80514                       | 10688 | 3698  | 1579 | 781  | 396  | 235  | 127 | 69  | 172  |
| large      | 12-24m | 1.505 (3.259) | 1.510 (2.495) | 66433                       | 10470 | 3861  | 1881 | 971  | 616  | 382  | 249 | 198 | 526  |
| large      | 28m+   | 1.481 (3.113) | 1.317 (2.040) | 202736                      | 33225 | 12249 | 5806 | 3228 | 1819 | 1087 | 744 | 480 | 1147 |
| small      | Gest   | 1.246 (2.385) | 0.630 (0.812) | 29665                       | 4756  | 1130  | 330  | 100  | 51   | 16   | 10  | 2   | 2    |
| small      | 1-35w  | 1.275 (2.455) | 0.696 (0.919) | 28929                       | 4817  | 1260  | 400  | 158  | 68   | 26   | 8   | 3   | 7    |
| small      | 12-24m | 1.445 (2.837) | 1.102 (1.567) | 31551                       | 6090  | 2142  | 876  | 383  | 225  | 128  | 76  | 49  | 107  |
| small      | 28m+   | 1.450 (2.824) | 1.091 (1.523) | 60231                       | 11889 | 4210  | 1719 | 857  | 402  | 235  | 147 | 96  | 168  |

1 **Table S4.** The mean and standard deviation of the vertex degree of the  $\alpha\delta$  graph (corresponding to figure  
 2 6(a)). The number of vertices having a given degree is also given per dataset and islet size.

| Islet Size | Dataset      | Mean  | Std Dev | Degree Count |        |       |      |     |    |
|------------|--------------|-------|---------|--------------|--------|-------|------|-----|----|
|            |              |       |         | 0            | 1      | 2     | 3    | 4   | 5  |
| all        | Gestation    | 0.518 | 0.716   | 215298       | 108701 | 31238 | 4777 | 282 | 6  |
| all        | 1-35 weeks   | 0.487 | 0.705   | 153467       | 69999  | 20183 | 3040 | 187 | 11 |
| all        | 12-24 months | 0.515 | 0.719   | 68612        | 34222  | 9633  | 1621 | 124 | 1  |
| all        | 28 months+   | 0.419 | 0.651   | 199833       | 80325  | 19040 | 2425 | 156 | 4  |
| large      | Gestation    | 0.540 | 0.733   | 167255       | 86704  | 26669 | 4314 | 262 | 6  |
| large      | 1-35 weeks   | 0.511 | 0.724   | 121410       | 57192  | 17767 | 2790 | 175 | 10 |
| large      | 12-24 months | 0.537 | 0.736   | 51939        | 26524  | 8008  | 1415 | 107 | 1  |
| large      | 28 months+   | 0.430 | 0.662   | 166809       | 67991  | 16973 | 2219 | 140 | 4  |
| small      | Gestation    | 0.434 | 0.639   | 48039        | 22001  | 4565  | 467  | 20  | 0  |
| small      | 1-35 weeks   | 0.388 | 0.612   | 32061        | 12803  | 2416  | 250  | 12  | 1  |
| small      | 12-24 months | 0.444 | 0.652   | 16673        | 7698   | 1625  | 206  | 17  | 0  |
| small      | 28 months+   | 0.360 | 0.589   | 33022        | 12332  | 2071  | 206  | 16  | 0  |

3

4

1 **Table S5.** The mean and standard deviation of the number of components per islet of the  $\alpha\delta$  graph  
2 (corresponding to figure 6(b)). The number of islets having a given number of components is also shown  
3 per dataset and islet size. Values for nonsingular islets are given in parentheses.

| Islet Size | Dataset | Mean              | StdDev            | # Components-per-Islet Count |               |               |             |             |             |            |           |           |           |            |  |  |  |  |  |  |
|------------|---------|-------------------|-------------------|------------------------------|---------------|---------------|-------------|-------------|-------------|------------|-----------|-----------|-----------|------------|--|--|--|--|--|--|
|            |         |                   |                   | 0-9                          | 10-19         | 20-29         | 30-39       | 40-49       | 50-59       | 60-69      | 70-79     | 80-89     | 90-99     | 100+       |  |  |  |  |  |  |
| all        | Gest    | 8.180<br>(1.631)  | 20.844<br>(4.620) | 26924<br>(31768)             | 2925<br>(752) | 1144<br>(192) | 602<br>(74) | 316<br>(33) | 266<br>(30) | 164<br>(9) | 90<br>(6) | 79<br>(2) | 58<br>(3) | 307<br>(6) |  |  |  |  |  |  |
| all        | 1-35w   | 8.301<br>(1.525)  | 20.135<br>(4.298) | 18087<br>(21972)             | 2240<br>(489) | 909<br>(117)  | 506<br>(37) | 283<br>(9)  | 188<br>(7)  | 114<br>(3) | 82<br>(4) | 54<br>(0) | 40<br>(4) | 144<br>(5) |  |  |  |  |  |  |
| all        | 12-24m  | 5.857<br>(1.157)  | 13.880<br>(3.094) | 12450<br>(14328)             | 1187<br>(212) | 449<br>(41)   | 203<br>(9)  | 109<br>(4)  | 76<br>(1)   | 37<br>(0)  | 23<br>(1) | 19<br>(0) | 14<br>(0) | 30<br>(1)  |  |  |  |  |  |  |
| all        | 28m+    | 7.740<br>(1.288)  | 48.314<br>(4.955) | 25700<br>(30202)             | 2626<br>(546) | 1039<br>(132) | 536<br>(36) | 323<br>(23) | 191<br>(9)  | 139<br>(5) | 92<br>(6) | 70<br>(2) | 40<br>(1) | 212<br>(6) |  |  |  |  |  |  |
| large      | Gest    | 26.130<br>(5.306) | 36.627<br>(8.248) | 2231<br>(6925)               | 2775<br>(751) | 1144<br>(193) | 602<br>(74) | 316<br>(33) | 266<br>(30) | 164<br>(9) | 90<br>(6) | 79<br>(2) | 58<br>(3) | 307<br>(6) |  |  |  |  |  |  |
| large      | 1-35w   | 23.294<br>(4.380) | 33.296<br>(7.260) | 1958<br>(5744)               | 2141<br>(489) | 909<br>(117)  | 506<br>(37) | 283<br>(9)  | 188<br>(7)  | 114<br>(3) | 82<br>(4) | 54<br>(0) | 40<br>(4) | 144<br>(5) |  |  |  |  |  |  |
| large      | 12-24m  | 14.244<br>(2.859) | 22.561<br>(5.046) | 2453<br>(4293)               | 1149<br>(213) | 449<br>(40)   | 203<br>(9)  | 109<br>(4)  | 76<br>(1)   | 37<br>(0)  | 23<br>(1) | 19<br>(0) | 14<br>(0) | 30<br>(1)  |  |  |  |  |  |  |
| large      | 28m+    | 17.104<br>(2.875) | 77.600<br>(7.759) | 6555<br>(10957)              | 2526<br>(546) | 1039<br>(132) | 536<br>(36) | 323<br>(23) | 191<br>(9)  | 139<br>(5) | 92<br>(6) | 70<br>(2) | 40<br>(1) | 212<br>(6) |  |  |  |  |  |  |
| small      | Gest    | 2.376<br>(0.442)  | 1.833<br>(0.689)  | 24693<br>(24843)             | 150<br>(0)    | 0<br>(0)      | 0<br>(0)    | 0<br>(0)    | 0<br>(0)    | 0<br>(0)   | 0<br>(0)  | 0<br>(0)  | 0<br>(0)  | 0<br>(0)   |  |  |  |  |  |  |
| small      | 1-35w   | 2.371<br>(0.395)  | 1.802<br>(0.652)  | 16129<br>(16228)             | 99<br>(0)     | 0<br>(0)      | 0<br>(0)    | 0<br>(0)    | 0<br>(0)    | 0<br>(0)   | 0<br>(0)  | 0<br>(0)  | 0<br>(0)  | 0<br>(0)   |  |  |  |  |  |  |
| small      | 12-24m  | 2.045<br>(0.383)  | 1.545<br>(0.655)  | 9997<br>(10035)              | 38<br>(0)     | 0<br>(0)      | 0<br>(0)    | 0<br>(0)    | 0<br>(0)    | 0<br>(0)   | 0<br>(0)  | 0<br>(0)  | 0<br>(0)  | 0<br>(0)   |  |  |  |  |  |  |
| small      | 28m+    | 2.036<br>(0.321)  | 1.585<br>(0.584)  | 19145<br>(19245)             | 100<br>(0)    | 0<br>(0)      | 0<br>(0)    | 0<br>(0)    | 0<br>(0)    | 0<br>(0)   | 0<br>(0)  | 0<br>(0)  | 0<br>(0)  | 0<br>(0)   |  |  |  |  |  |  |



1 **Table S6.** The mean and standard deviation of the number of cells per component of the  $\alpha\delta$  graph  
2 (corresponding to figure 6(c)). The number of components having a given number of cells is also shown  
3 per dataset and islet size. Values for nonsingular islets are given in parentheses.

| Islet Size | Dataset | Mean          | Std Dev       | # Cells-per-Component Count |       |       |      |      |     |     |     |     |     |  |
|------------|---------|---------------|---------------|-----------------------------|-------|-------|------|------|-----|-----|-----|-----|-----|--|
|            |         |               |               | 1                           | 2     | 3     | 4    | 5    | 6   | 7   | 8   | 9   | 10+ |  |
| all        | Gest    | 1.340 (2.705) | 0.945 (1.466) | 215298                      | 34648 | 10606 | 4238 | 1840 | 947 | 521 | 281 | 168 | 359 |  |
| all        | 1-35w   | 1.313 (2.706) | 0.906 (1.448) | 153467                      | 22282 | 6885  | 2714 | 1213 | 583 | 316 | 175 | 107 | 252 |  |
| all        | 12-24m  | 1.336 (2.701) | 0.949 (1.497) | 68612                       | 11022 | 3278  | 1272 | 578  | 319 | 160 | 95  | 50  | 112 |  |
| all        | 28m+    | 1.259 (2.557) | 0.749 (1.163) | 199833                      | 27525 | 7507  | 2590 | 1108 | 514 | 253 | 153 | 85  | 138 |  |
| large      | Gest    | 1.359 (2.768) | 1.001 (1.564) | 167255                      | 26752 | 8640  | 3564 | 1588 | 848 | 462 | 260 | 163 | 344 |  |
| large      | 1-35w   | 1.333 (2.772) | 0.961 (1.536) | 121410                      | 17564 | 5736  | 2376 | 1093 | 537 | 302 | 162 | 98  | 245 |  |
| large      | 12-24m  | 1.354 (2.765) | 1.009 (1.606) | 51939                       | 8292  | 2561  | 1048 | 486  | 278 | 142 | 81  | 47  | 107 |  |
| large      | 28m+    | 1.267 (2.591) | 0.774 (1.208) | 166809                      | 22875 | 6423  | 2321 | 1013 | 479 | 239 | 142 | 81  | 131 |  |
| small      | Gest    | 1.272 (2.462) | 0.706 (0.969) | 48039                       | 7898  | 1964  | 674  | 252  | 98  | 57  | 22  | 6   | 16  |  |
| small      | 1-35w   | 1.236 (2.415) | 0.647 (0.919) | 32061                       | 4716  | 1149  | 338  | 120  | 46  | 14  | 13  | 9   | 7   |  |
| small      | 12-24m  | 1.278 (2.483) | 0.728 (1.019) | 16673                       | 2730  | 717   | 224  | 92   | 41  | 18  | 14  | 3   | 5   |  |
| small      | 28m+    | 1.216 (2.371) | 0.604 (0.855) | 33022                       | 4650  | 1084  | 268  | 95   | 36  | 14  | 11  | 4   | 7   |  |

1

2 **Table S7.** The mean and standard deviation of the vertex degree of the  $\alpha\delta$ - $\beta$  graph (corresponding to  
 3 figure 6(d)). The number of vertices having a given degree is also given per dataset and islet size.

| Islet Size | Dataset      | Mean  | StdDev | Degree Count |       |       |      |    |   |
|------------|--------------|-------|--------|--------------|-------|-------|------|----|---|
|            |              |       |        | 0            | 1     | 2     | 3    | 4  | 5 |
| all        | Gestation    | 0.164 | 0.422  | 478057       | 71705 | 8939  | 763  | 35 | 0 |
| all        | 1-35 weeks   | 0.136 | 0.391  | 372793       | 44245 | 5772  | 516  | 23 | 1 |
| all        | 12-24 months | 0.122 | 0.379  | 271359       | 27320 | 4041  | 439  | 35 | 1 |
| all        | 28 months+   | 0.132 | 0.389  | 713154       | 81162 | 11150 | 1056 | 56 | 2 |
| large      | Gestation    | 0.172 | 0.433  | 373083       | 58059 | 7612  | 697  | 32 | 0 |
| large      | 1-35 weeks   | 0.148 | 0.408  | 287730       | 36962 | 5117  | 483  | 20 | 1 |
| large      | 12-24 months | 0.139 | 0.404  | 190907       | 22147 | 3385  | 372  | 30 | 1 |
| large      | 28 months+   | 0.151 | 0.413  | 558251       | 73380 | 10334 | 992  | 51 | 2 |
| small      | Gestation    | 0.138 | 0.380  | 104970       | 13652 | 1325  | 66   | 3  | 0 |
| small      | 1-35 weeks   | 0.094 | 0.318  | 85063        | 7283  | 655   | 33   | 3  | 0 |
| small      | 12-24 months | 0.078 | 0.304  | 80452        | 5173  | 656   | 67   | 5  | 0 |
| small      | 28 months+   | 0.059 | 0.261  | 154905       | 7779  | 816   | 65   | 5  | 0 |

4

5

1

2 **Table S8.** The mean and standard deviation of the number of components per islet of the  $\alpha\delta$ - $\beta$  graph  
3 (corresponding to figure 6(e)). The number of islets having a given number of components is also shown  
4 per dataset and islet size. Values for nonsingular islets are given in parentheses.

| Islet Size | Data   | Mean              | Std Dev           | # Components-per-Islet Count |               |               |              |              |            |            |            |            |            |             |  |  |  |  |  |  |
|------------|--------|-------------------|-------------------|------------------------------|---------------|---------------|--------------|--------------|------------|------------|------------|------------|------------|-------------|--|--|--|--|--|--|
|            |        |                   |                   | 0-9                          | 10-19         | 20-29         | 30-39        | 40-49        | 50-59      | 60-69      | 70-79      | 80-89      | 90-99      | 100+        |  |  |  |  |  |  |
| all        | Gest   | 13.415<br>(0.927) | 37.272<br>(2.920) | 28658<br>(37629)             | 4082<br>(466) | 1716<br>(113) | 977<br>(48)  | 631<br>(15)  | 454<br>(5) | 317<br>(2) | 247<br>(0) | 175<br>(2) | 144<br>(1) | 880<br>(0)  |  |  |  |  |  |  |
| all        | 1-35w  | 13.528<br>(0.750) | 34.751<br>(2.590) | 21180<br>(28815)             | 3298<br>(289) | 1501<br>(46)  | 861<br>(8)   | 535<br>(1)   | 426<br>(5) | 275<br>(5) | 208<br>(3) | 156<br>(1) | 147<br>(1) | 587<br>(0)  |  |  |  |  |  |  |
| all        | 12-24m | 11.389<br>(0.537) | 26.758<br>(2.151) | 18532<br>(24789)             | 2981<br>(181) | 1190<br>(26)  | 667<br>(6)   | 434<br>(1)   | 321<br>(1) | 190<br>(0) | 137<br>(0) | 120<br>(0) | 87<br>(0)  | 346<br>(1)  |  |  |  |  |  |  |
| all        | 28m+   | 14.386<br>(0.765) | 49.948<br>(2.869) | 37157<br>(51429)             | 6261<br>(674) | 2825<br>(175) | 1585<br>(46) | 1039<br>(19) | 734<br>(8) | 543<br>(4) | 398<br>(0) | 304<br>(0) | 267<br>(0) | 1243<br>(1) |  |  |  |  |  |  |
| large      | Gest   | 49.848<br>(3.560) | 69.860<br>(5.539) | 540<br>(7407)                | 1990<br>(467) | 1705<br>(113) | 977<br>(48)  | 631<br>(15)  | 454<br>(5) | 317<br>(2) | 247<br>(0) | 175<br>(2) | 144<br>(1) | 880<br>(0)  |  |  |  |  |  |  |
| large      | 1-35w  | 47.174<br>(2.813) | 62.787<br>(4.899) | 144<br>(6127)                | 1654<br>(289) | 1493<br>(46)  | 861<br>(8)   | 535<br>(1)   | 426<br>(5) | 275<br>(5) | 208<br>(3) | 156<br>(1) | 147<br>(1) | 587<br>(0)  |  |  |  |  |  |  |
| large      | 12-24m | 38.939<br>(2.099) | 49.470<br>(4.308) | 681<br>(4966)                | 1059<br>(181) | 1140<br>(26)  | 667<br>(6)   | 434<br>(1)   | 321<br>(1) | 190<br>(0) | 137<br>(0) | 120<br>(0) | 87<br>(0)  | 346<br>(1)  |  |  |  |  |  |  |
| large      | 28m+   | 44.269<br>(2.695) | 92.143<br>(5.165) | 1801<br>(12501)              | 2785<br>(674) | 2730<br>(175) | 1584<br>(46) | 1039<br>(19) | 733<br>(8) | 544<br>(4) | 398<br>(0) | 304<br>(0) | 267<br>(0) | 1243<br>(1) |  |  |  |  |  |  |
| small      | Gest   | 3.698<br>(0.225)  | 3.127<br>(0.528)  | 28118<br>(30221)             | 2092<br>(0)   | 11<br>(0)     | 0<br>(0)     | 0<br>(0)     | 0<br>(0)   | 0<br>(0)   | 0<br>(0)   | 0<br>(0)   | 0<br>(0)   | 0<br>(0)    |  |  |  |  |  |  |
| small      | 1-35w  | 3.909<br>(0.160)  | 3.144<br>(0.448)  | 21036<br>(22688)             | 1644<br>(0)   | 8<br>(0)      | 0<br>(0)     | 0<br>(0)     | 0<br>(0)   | 0<br>(0)   | 0<br>(0)   | 0<br>(0)   | 0<br>(0)   | 0<br>(0)    |  |  |  |  |  |  |
| small      | 12-24m | 4.187<br>(0.129)  | 3.636<br>(0.427)  | 17851<br>(19823)             | 1922<br>(0)   | 50<br>(0)     | 0<br>(0)     | 0<br>(0)     | 0<br>(0)   | 0<br>(0)   | 0<br>(0)   | 0<br>(0)   | 0<br>(0)   | 0<br>(0)    |  |  |  |  |  |  |
| small      | 28m+   | 4.078<br>(0.099)  | 3.546<br>(0.366)  | 35356<br>(38928)             | 3476<br>(0)   | 95<br>(0)     | 1<br>(0)     | 0<br>(0)     | 0<br>(0)   | 0<br>(0)   | 0<br>(0)   | 0<br>(0)   | 0<br>(0)   | 0<br>(0)    |  |  |  |  |  |  |

1

2 **Table S9.** The mean and standard deviation of the number of cells per component of the  $\alpha\delta$ - $\beta$  graph  
3 (corresponding to figure 6(f)). The number of components having a given number of cells is also shown  
4 per dataset and islet size. Values for nonsingular islets are given in parentheses.

| Islet Size | Dataset | Mean          | Std Dev       | # Cells-per-Component Count |       |      |      |     |     |    |    |    |     |
|------------|---------|---------------|---------------|-----------------------------|-------|------|------|-----|-----|----|----|----|-----|
|            |         |               |               | 1                           | 2     | 3    | 4    | 5   | 6   | 7  | 8  | 9  | 10+ |
| all        | Gest    | 1.089 (2.295) | 0.371 (0.658) | 478057                      | 27743 | 5843 | 1341 | 370 | 131 | 32 | 16 | 6  | 2   |
| all        | 1-35w   | 1.073 (2.312) | 0.341 (0.686) | 372793                      | 16910 | 3670 | 920  | 241 | 79  | 24 | 12 | 7  | 4   |
| all        | 12-24m  | 1.065 (2.370) | 0.337 (0.783) | 271359                      | 9908  | 2602 | 618  | 189 | 68  | 20 | 12 | 8  | 6   |
| all        | 28m+    | 1.071 (2.333) | 0.341 (0.711) | 713154                      | 30485 | 7014 | 1778 | 502 | 162 | 68 | 21 | 15 | 4   |
| large      | Gest    | 1.094 (2.314) | 0.385 (0.684) | 373083                      | 22129 | 4877 | 1179 | 335 | 118 | 31 | 15 | 6  | 2   |
| large      | 1-35w   | 1.080 (2.334) | 0.361 (0.713) | 287730                      | 13866 | 3198 | 831  | 231 | 73  | 20 | 12 | 7  | 4   |
| large      | 12-24m  | 1.075 (2.384) | 0.364 (0.805) | 190907                      | 7935  | 2169 | 511  | 163 | 56  | 19 | 11 | 8  | 5   |
| large      | 28m+    | 1.082 (2.342) | 0.367 (0.723) | 558251                      | 27362 | 6425 | 1668 | 480 | 153 | 62 | 20 | 15 | 4   |
| small      | Gest    | 1.074 (2.214) | 0.318 (0.526) | 104970                      | 5618  | 966  | 161  | 35  | 13  | 1  | 1  | 0  | 0   |
| small      | 1-35w   | 1.049 (2.200) | 0.260 (0.517) | 85063                       | 3044  | 472  | 89   | 10  | 6   | 4  | 0  | 0  | 0   |
| small      | 12-24m  | 1.040 (2.310) | 0.256 (0.681) | 80452                       | 1973  | 433  | 107  | 26  | 12  | 1  | 1  | 0  | 1   |
| small      | 28m+    | 1.030 (2.246) | 0.213 (0.587) | 154905                      | 3120  | 589  | 111  | 22  | 9   | 6  | 1  | 0  | 0   |

1 **Table S10.** For each simulation type and  $rlp_a$  value, the  $rlp_d$  value that produced measure equilibrium was  
2 found. Simulations for each set were run and their pair correlation functions are given in Figure S13.  
3 The integration of the absolute value of the difference between the pair correlation function of the given  
4 developmental stage dataset and that of each measure equilibrium is given (Diff).

| <u>Gestation to 1-35weeks</u> |         |         |       | <u>1-35weeks to 12-24 months</u> |         |         |      | <u>12-24 months to 28 months+</u> |         |         |       |
|-------------------------------|---------|---------|-------|----------------------------------|---------|---------|------|-----------------------------------|---------|---------|-------|
| Sim Type                      | $rlp_a$ | $rlp_d$ | Diff  | Sim Type                         | $rlp_a$ | $rlp_d$ | Diff | Sim Type                          | $rlp_a$ | $rlp_d$ | Diff  |
| MP                            | 0       | 1.6776  | 12.26 | MP                               | 0       | 1.0483  | 6.40 | MP                                | 0       | 1.6028  | 8.59  |
| MP                            | 1       | 1.6312  | 12.08 | MP                               | 1       | 1.0079  | 6.32 | MP                                | 1       | 1.5573  | 8.40  |
| MP                            | 2       | 1.6278  | 12.02 | MP                               | 2       | 1.04    | 6.43 | MP                                | 2       | 1.5774  | 8.46  |
| MP                            | 3       | 1.6442  | 12.12 | MP                               | 3       | 1.0872  | 6.48 | MP                                | 3       | 1.6119  | 8.49  |
| MP                            | 4       | 1.6528  | 12.12 | MP                               | 4       | 1.1094  | 6.51 | MP                                | 4       | 1.6291  | 8.52  |
| MP                            | 5       | 1.6547  | 12.13 | MP                               | 5       | 1.1148  | 6.60 | MP                                | 5       | 1.6333  | 8.55  |
| MP                            | 6       | 1.6553  | 12.09 | MP                               | 6       | 1.1152  | 6.58 | MP                                | 6       | 1.6345  | 8.56  |
| MP                            | 7       | 1.6552  | 12.11 | MP                               | 7       | 1.1154  | 6.59 | MP                                | 7       | 1.6345  | 8.55  |
| PP                            | 0       | 1.696   | 12.13 | PP                               | 0       | 1.2242  | 6.70 | PP                                | 0       | 1.7038  | 8.67  |
| PP                            | 1       | 1.8544  | 12.51 | PP                               | 1       | 1.5272  | 7.17 | PP                                | 1       | 1.8927  | 9.22  |
| PP                            | 2       | 2.1751  | 13.29 | PP                               | 2       | 1.7954  | 7.91 | PP                                | 2       | 2.3573  | 9.93  |
| PP                            | 3       | 2.5684  | 13.66 | PP                               | 3       | 1.9726  | 8.57 | PP                                | 3       | 2.6218  | 10.51 |
| PP                            | 4       | 2.6459  | 14.01 | PP                               | 4       | 2.0528  | 8.78 | PP                                | 4       | 2.6779  | 10.77 |
| PP                            | 5       | 2.645   | 14.17 | PP                               | 5       | 2.0534  | 8.80 | PP                                | 5       | 2.6698  | 10.96 |
| PP                            | 6       | 2.5929  | 13.99 | PP                               | 6       | 1.9963  | 8.74 | PP                                | 6       | 2.6126  | 10.76 |
| PP                            | 7       | 2.4546  | 13.86 | PP                               | 7       | 1.8958  | 8.42 | PP                                | 7       | 2.4185  | 10.32 |
